# Supplementary material for: Visualizing tumour self-homing with magnetic particle imaging
Source: Royal Society of Chemistry journal article supplement (doi:10.1039/d0nr07983a), 2021-01-01
Supplement: d0nr07983a1.pdf [file d0nr07983a1.pdf]

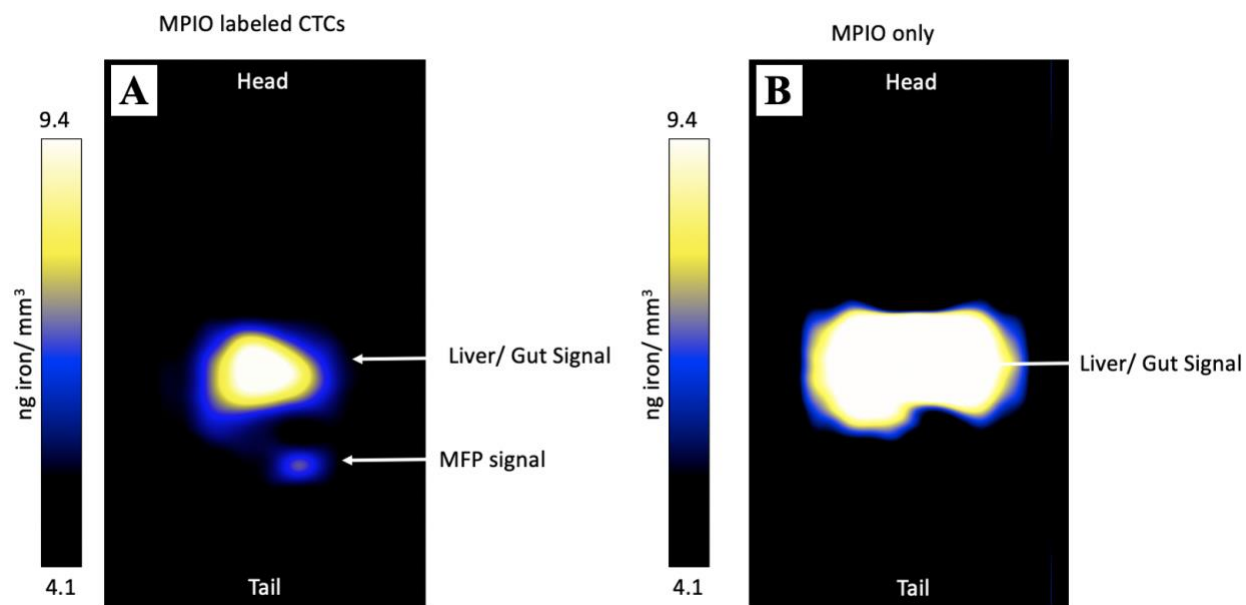

Supplementary Figure 1: Tumour bearing mice injected with only MPIO, did not have MPI signal detectable at the tumour site (B) as seen in mice that received self-homing CTCs (A). However, signal was detected in the abdomen, likely coming from the liver or intestines.
